# Supplementary figures and images for: Metabolic Reprogramming by Ribitol Expands the Therapeutic Window of BETi JQ1 against Breast Cancer
Source: MDPI journal article supplement (doi:10.3390/cancers15174356), 2023-09-01

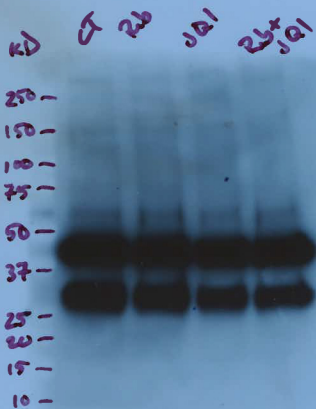

$\beta$ -Actin

# Bcl-2

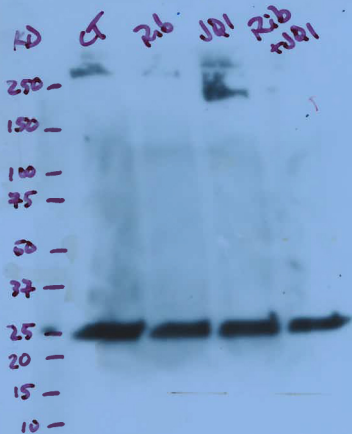

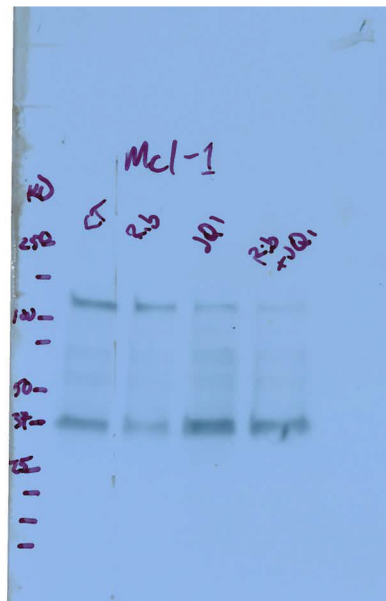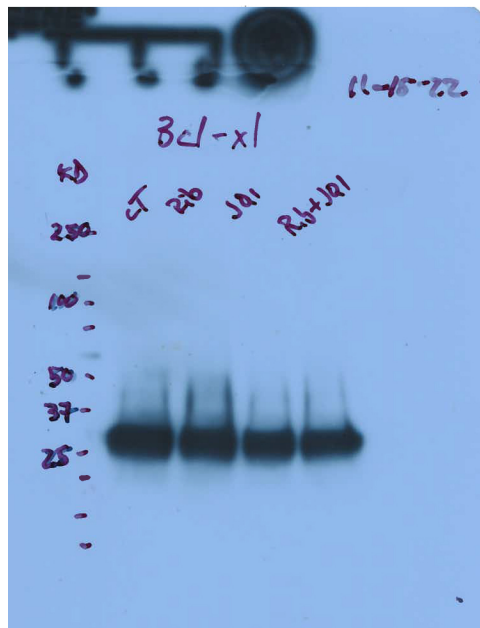

10-16-22

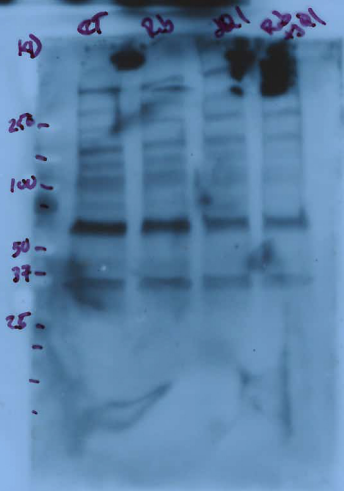

C-myc

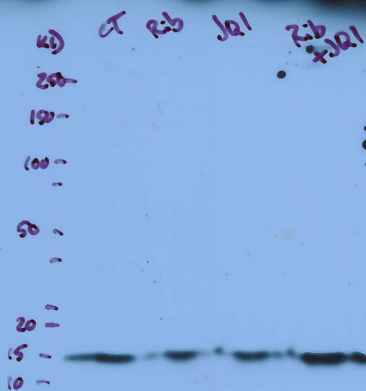

Cytochrome C

P53

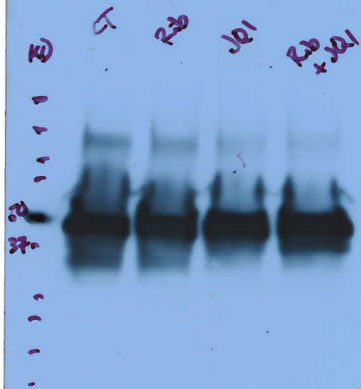

Supplement: s1 [file s1]
